# Supplementary material
Source: publisher figshare collection journal article supplement (https://plos.figshare.com/articles/dataset/_/1323303)
Supplement: Supplementary file 1 [file 1 › S1_Fig.pdf]

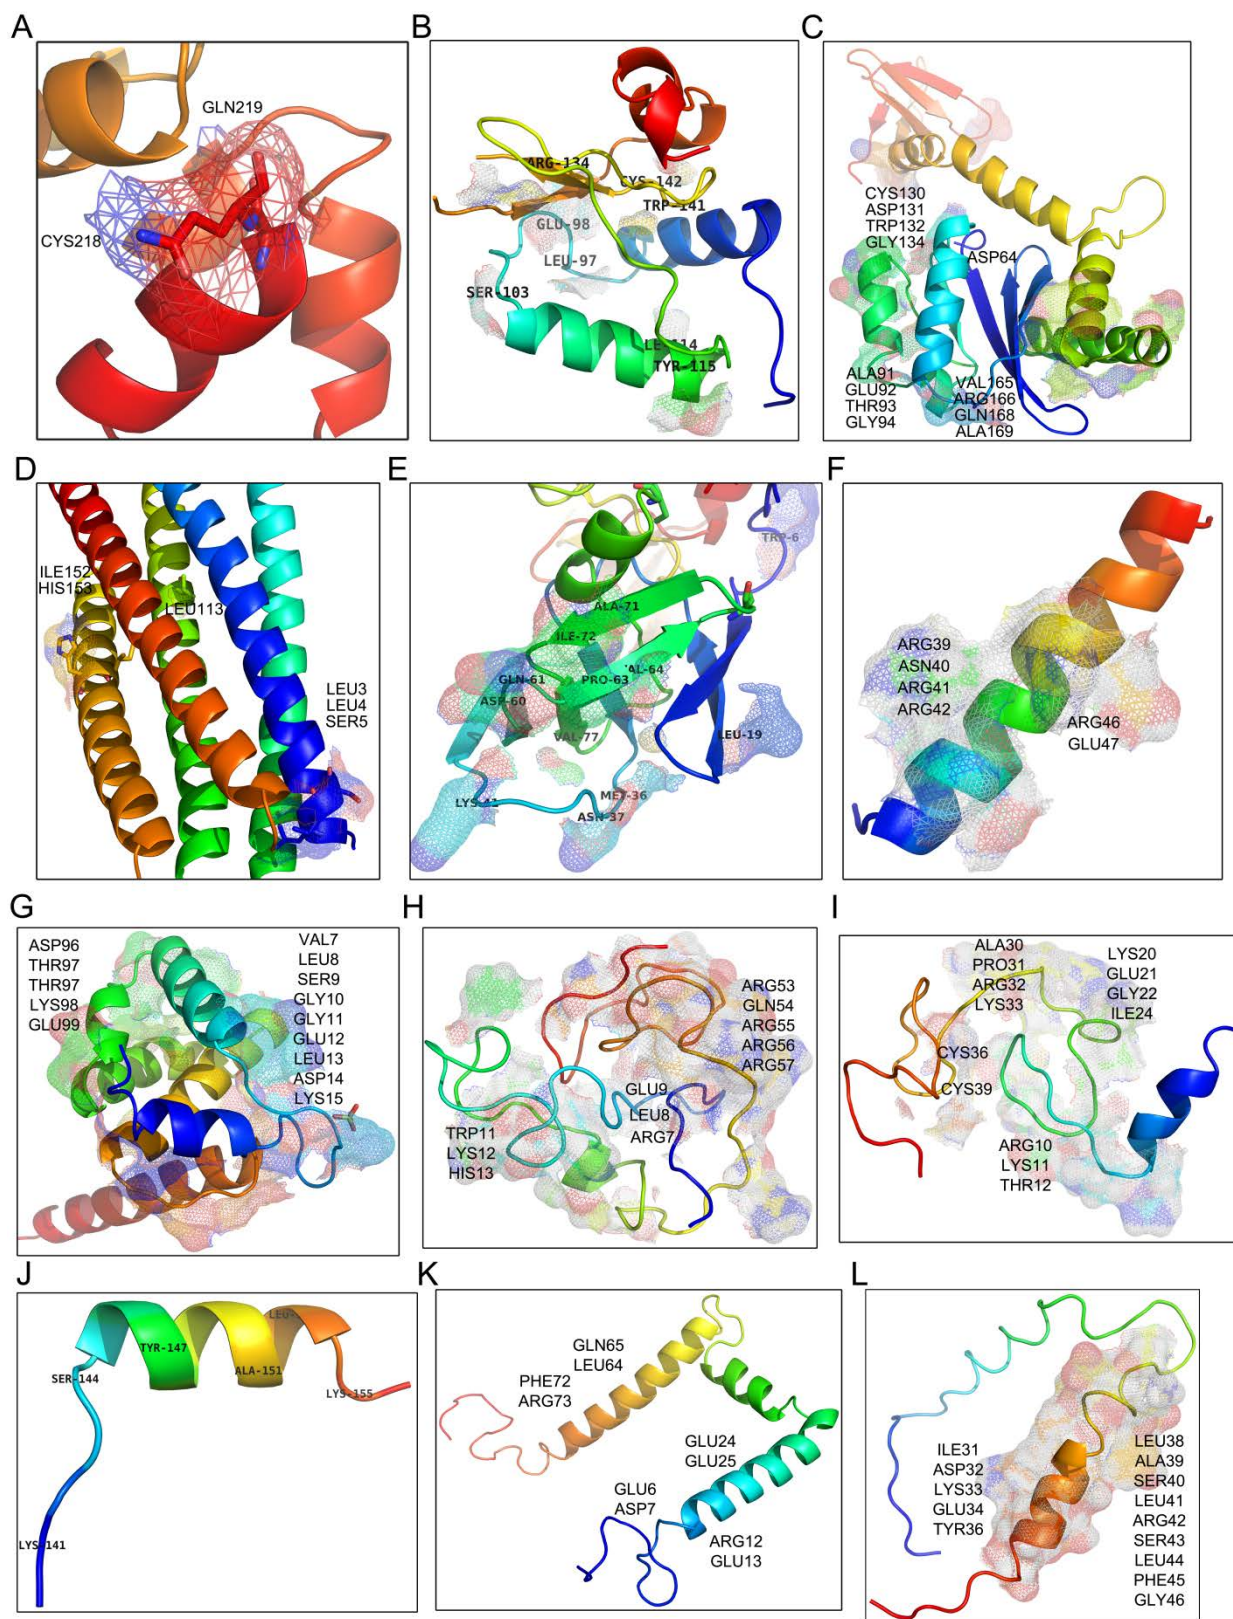

**Supplementary Figure S1. Protein sectors in HIV-1 proteins.** The panels (A-L) represent CA, NEF, IN, GP41, PR, REV, MA, TAT, NC, VIF, VPR, and P6 respectively. Only part of the coevolving residue pairs was labeled. The detailed coevolution events were listed in Figure 2.
