# Supplementary material
Source: publisher figshare collection journal article supplement (https://plos.figshare.com/articles/dataset/_/1323303)
Supplement: Supplementary file 1 [file 1 › S2_Fig.pdf]

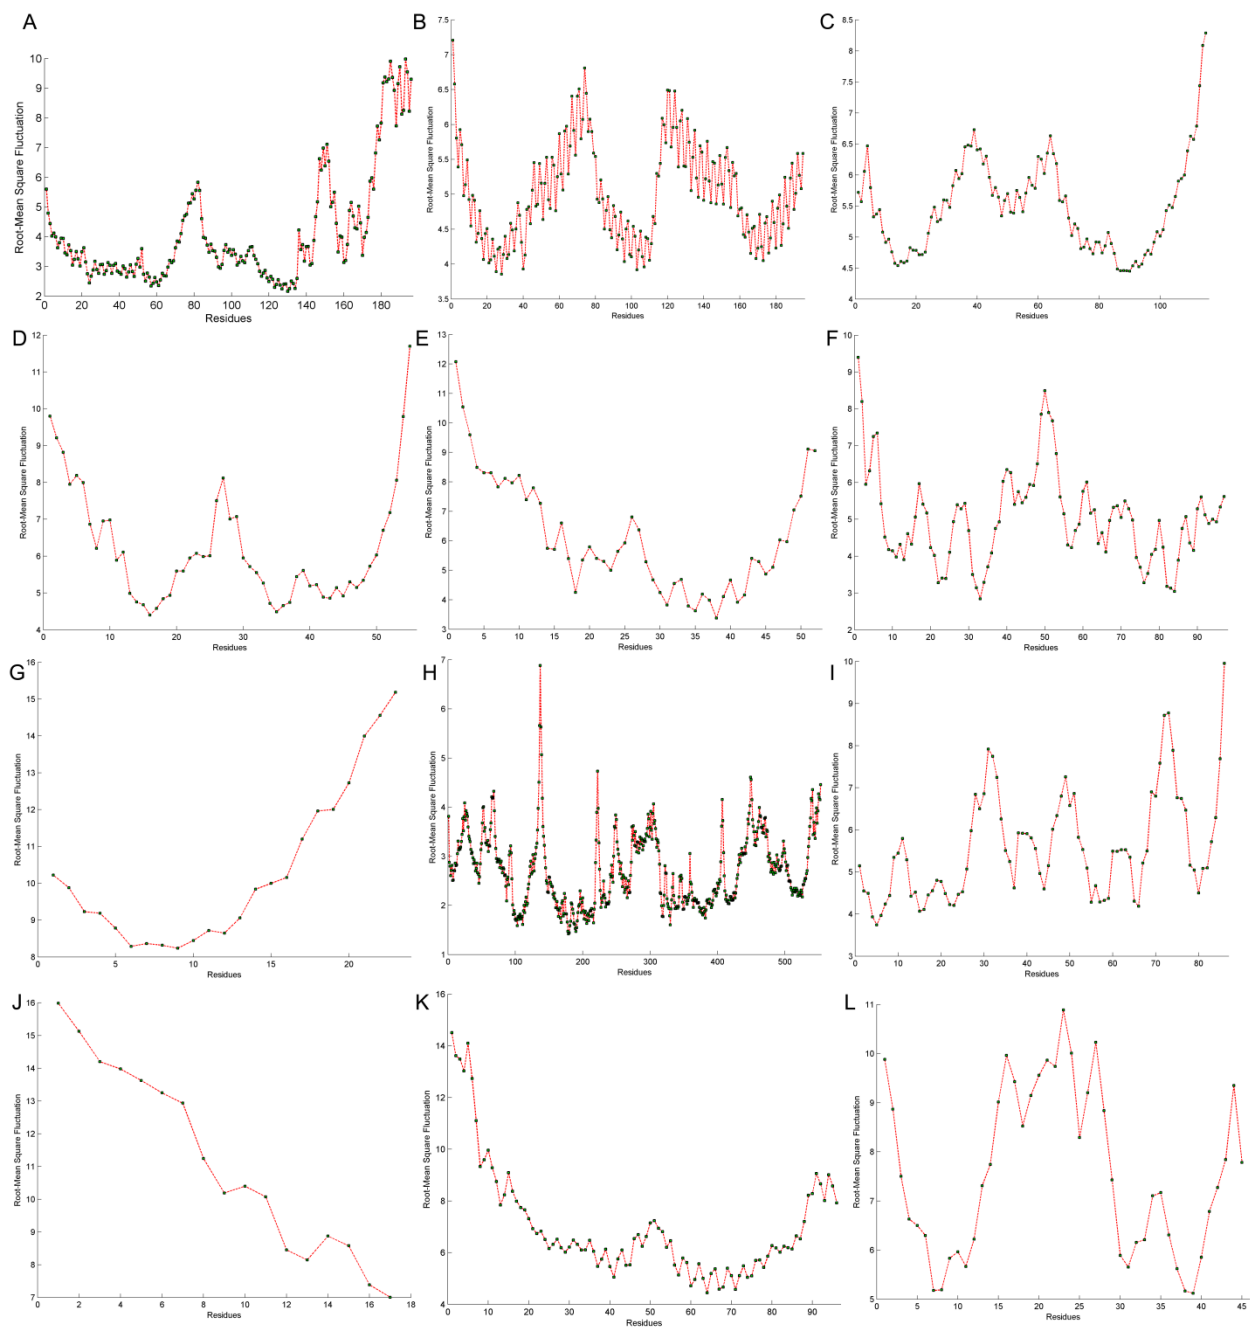

**Supplement Figure S2. Root-mean square fluctuation (RMSF) of residues in HIV proteins during the molecular dynamics (MD) simulations.** Panel A-L represent CA, GP41, MA, NC, P6, PR, REV, RT, TAT, VIF, VPR, and VPU respectively. For each protein, X axis is the sequence of the protein structure in Table 2 while Y axis is the average RMSF during the 10 ns molecular dynamic simulations.
