# Supplementary material
Source: publisher figshare collection journal article supplement (https://plos.figshare.com/articles/dataset/_/1323303)
Supplement: Supplementary file 1 [file 1 › S3_Fig.pdf]

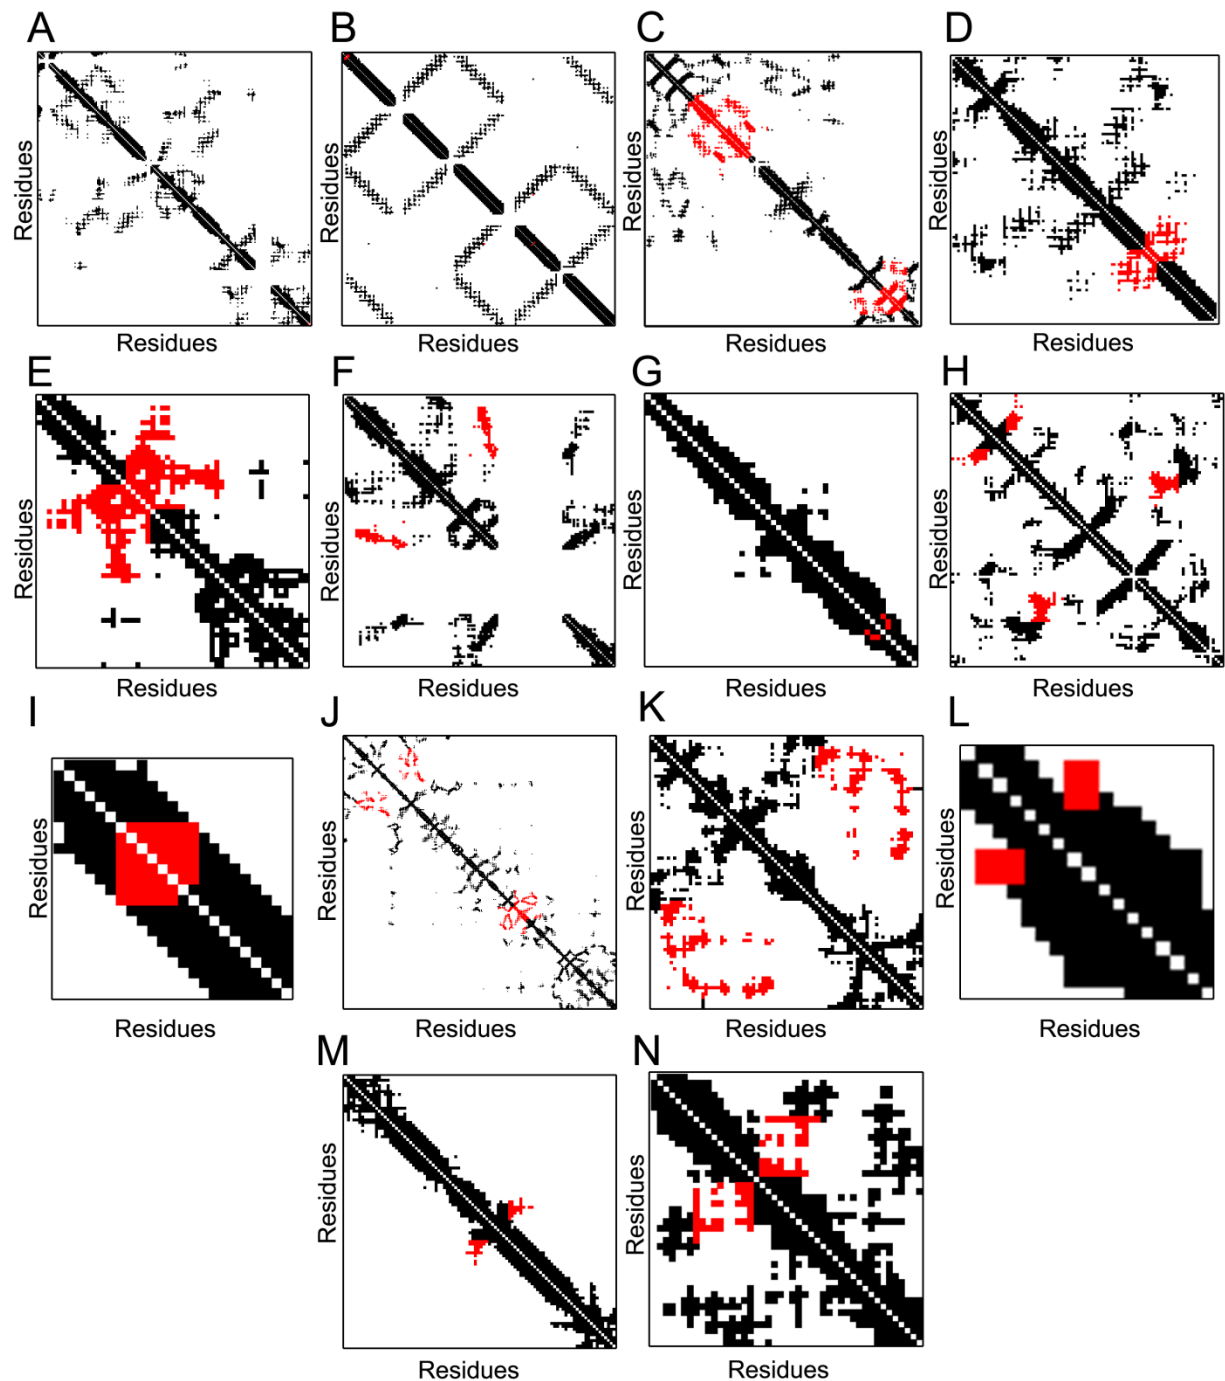

**Supplement Figure S3. Contact map of HIV proteins during molecular dynamic simulations.** Panel (A-N) represent CA, GP41, IN, MA, NC, NEF, P6, PR, REV, RT, TAT, VIF, VPR, and VPU respectively. The red regions are the protein sectors. For TAT and VPR, only the top ten coevolving residues were marked.
