# Supplementary material
Source: publisher figshare collection journal article supplement (https://plos.figshare.com/articles/dataset/_/1323303)
Supplement: Supplementary file 1 [file 1 › S5_Fig.pdf]

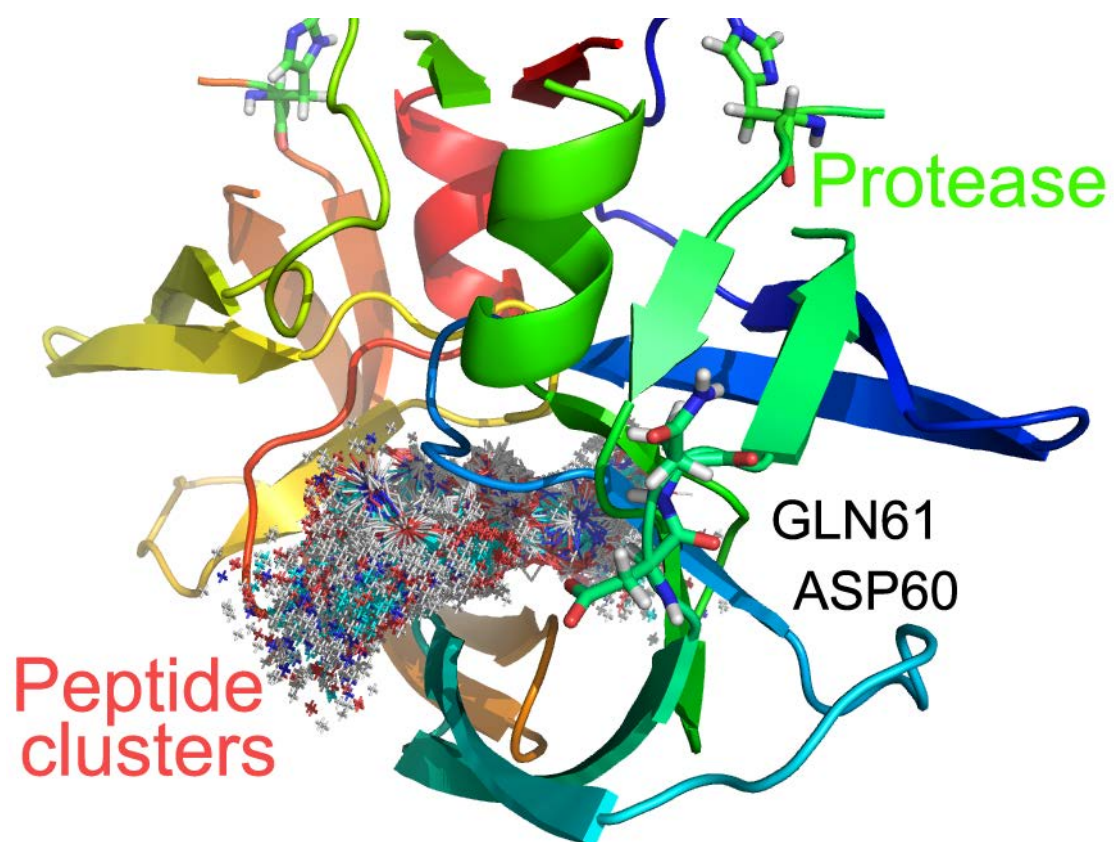

**Supplement Figure S5. The docking results between HIV-1 protease and DQ peptide inhibitor.** The stars represent conformation clusters of DQ peptide.
